# Supplementary material for: Foliar Application of Sodium Nitroprusside Boosts Solanum lycopersicum L. Tolerance to Glyphosate by Preventing Redox Disorders and Stimulating Herbicide Detoxification Pathways
Source: MDPI journal article supplement (doi:10.3390/plants10091862), 2021-09-09
Supplement: s1 [file s1]

## Supplementary Material

**Table S1.** Detailed ANOVA results for all evaluated parameters in roots of *Solanum lycopersicum* L. cv. Micro-Tom grown for 28 days in OECD soil contaminated by GLY (10 mg kg<sup>-1</sup>) and/or foliar treated with SNP (200 µM). Parameters where significant differences ( $p \leq 0.05$ ) were recorded are highlighted at bold.

| Parameter                     | ANOVA                                              |
|-------------------------------|----------------------------------------------------|
| Root length                   | <b>F (3, 10) = 19.11; <math>p &lt; 0.01</math></b> |
| Fresh biomass                 | <b>F (3, 9) = 64.36; <math>p &lt; 0.01</math></b>  |
| NR                            | F (3, 8) = 3.013; $p > 0.05$                       |
| Total protein                 | <b>F (3, 10) = 19.21; <math>p &lt; 0.01</math></b> |
| LP                            | <b>F (3, 9) = 9.339; <math>p &lt; 0.01</math></b>  |
| O <sub>2</sub> <sup>-</sup>   | <b>F (3, 16) = 12.03; <math>p &lt; 0.01</math></b> |
| H <sub>2</sub> O <sub>2</sub> | <b>F (3, 8) = 12.29; <math>p &lt; 0.01</math></b>  |
| Proline                       | <b>F (3, 12) = 14.17; <math>p &lt; 0.01</math></b> |
| GSH                           | <b>F (3, 8) = 46.08; <math>p &lt; 0.01</math></b>  |
| Total AsA                     | <b>F (3, 8) = 7.842; <math>p &lt; 0.01</math></b>  |
| AsA/DHA                       | <b>F (3, 13) = 5.991; <math>p &lt; 0.01</math></b> |
| TAC                           | <b>F (3, 8) = 4.792; <math>p &lt; 0.05</math></b>  |
| TPC                           | F (3, 8) = 0.3788; $p > 0.05$                      |
| SOD                           | <b>F (3, 9) = 10.36; <math>p &lt; 0.01</math></b>  |
| CAT                           | <b>F (3, 9) = 13.45; <math>p &lt; 0.01</math></b>  |
| APX                           | <b>F (3, 8) = 23.07; <math>p &lt; 0.01</math></b>  |
| GST                           | <b>F (3, 9) = 50.51; <math>p &lt; 0.01</math></b>  |

**Table S2.** Detailed ANOVA results for all evaluated parameters in shoots of *Solanum lycopersicum* L. cv. Micro-Tom grown for 28 days in OECD soil contaminated by GLY (10 mg kg<sup>-1</sup>) and/or foliar treated with SNP (200  $\mu$ M). Parameters where significant differences ( $p \leq 0.05$ ) were recorded are highlighted at bold.

| Parameter                     | ANOVA                                              |
|-------------------------------|----------------------------------------------------|
| Fresh biomass                 | <b>F (3, 10) = 13.74; <math>p &lt; 0.01</math></b> |
| NR                            | <b>F (3, 8) = 7.339; <math>p &lt; 0.05</math></b>  |
| Total protein                 | <b>F (3, 27) = 3.902; <math>p &lt; 0.05</math></b> |
| LP                            | <b>F (3, 8) = 14.02; <math>p &lt; 0.01</math></b>  |
| O <sub>2</sub> <sup>-</sup>   | <b>F (3, 17) = 20.23; <math>p &lt; 0.01</math></b> |
| H <sub>2</sub> O <sub>2</sub> | F (3, 10) = 1.127; $p > 0.05$                      |
| Proline                       | <b>F (3, 9) = 28.02; <math>p &lt; 0.01</math></b>  |
| GSH                           | <b>F (3, 15) = 14.83; <math>p &lt; 0.01</math></b> |
| Total AsA                     | <b>F (3, 9) = 7.387; <math>p &lt; 0.01</math></b>  |
| AsA/DHA                       | <b>F (3, 9) = 5.532; <math>p &lt; 0.05</math></b>  |
| TAC                           | F (3, 8) = 1.445; $p > 0.05$                       |
| TPC                           | <b>F (3, 5) = 49.63; <math>p &lt; 0.01</math></b>  |
| SOD                           | F (3, 9) = 2.874; $p > 0.05$                       |
| CAT                           | <b>F (3, 7) = 27.41; <math>p &lt; 0.01</math></b>  |
| APX                           | <b>F (3, 9) = 7.474; <math>p &lt; 0.01</math></b>  |
| GST                           | <b>F (3, 9) = 6.360; <math>p &lt; 0.05</math></b>  |

**Table S3.** Detailed ANOVA results for productivity-related parameters of *Solanum lycopersicum* L. cv. Micro-Tom grown for 28 days in OECD soil contaminated by GLY (10 mg kg<sup>-1</sup>) and/or foliar treated with SNP (200  $\mu$ M). Parameters where significant differences ( $p \leq 0.05$ ) were recorded are highlighted at bold.

| Parameter           | ANOVA                                              |
|---------------------|----------------------------------------------------|
| Number of flowers   | <b>F (3, 10) = 4.444; <math>p &lt; 0.05</math></b> |
| Number of fruits    | <b>F (3, 14) = 4.370; <math>p &lt; 0.05</math></b> |
| Fruit fresh biomass | F (3, 16) = 0.571; $p > 0.05$                      |
